# Supplementary material for: New efficient ligand for sub-mol % copper-catalyzed C–N cross-coupling reactions running under air
Source: publisher site journal article supplement (doi:10.3762/bjoc.8.221), 2012-11-09

# Supporting Information

for

## **New efficient ligand for sub-mol % copper-catalyzed C–N cross-coupling reactions running under air**

Per-Fredrik Larsson, Peter Astvik, Per-Ola Norrby\*

Address: University of Gothenburg, Department of Chemistry and Molecular Biology,  
Kemigården 4, SE-412 96, Gothenburg, Sweden

Email: Per-Ola Norrby - pon@chem.gu.se

\* Corresponding author

$^1\text{H}$  NMR and  $^{13}\text{C}$  NMR data of compounds **1–4**.

$^1\text{H}$  NMR (400 MHz,  $\text{CDCl}_3$ ):

4-Methyl-*N,N*-bis(2-(4-methylphenylsulfonamido)ethyl)benzenesulfonamide (**1**)

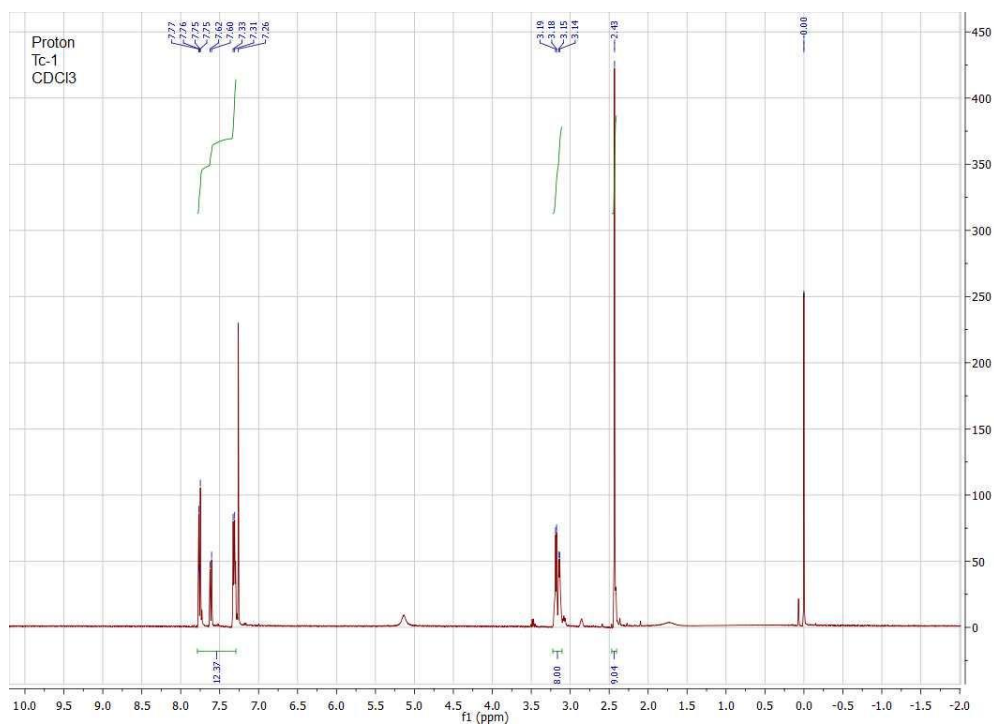

$^{13}\text{C}$  NMR (400 MHz,  $\text{CDCl}_3$ ):

4-Methyl-*N,N*-bis(2-(4-methylphenylsulfonamido)ethyl)benzenesulfonamide (**1**)

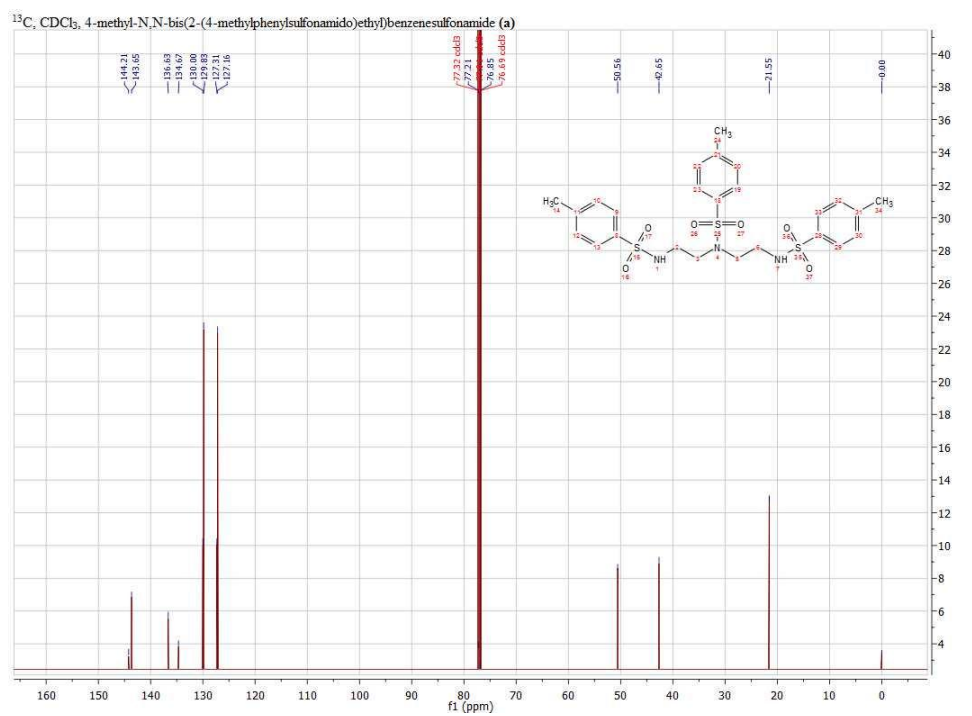

$^1\text{H}$  NMR (400 MHz,  $\text{CDCl}_3$ ):

*N,N*-Bis(2-(*N*,4-dimethylphenylsulfonamido)ethyl)-4-methylbenzenesulfonamide (**2**)

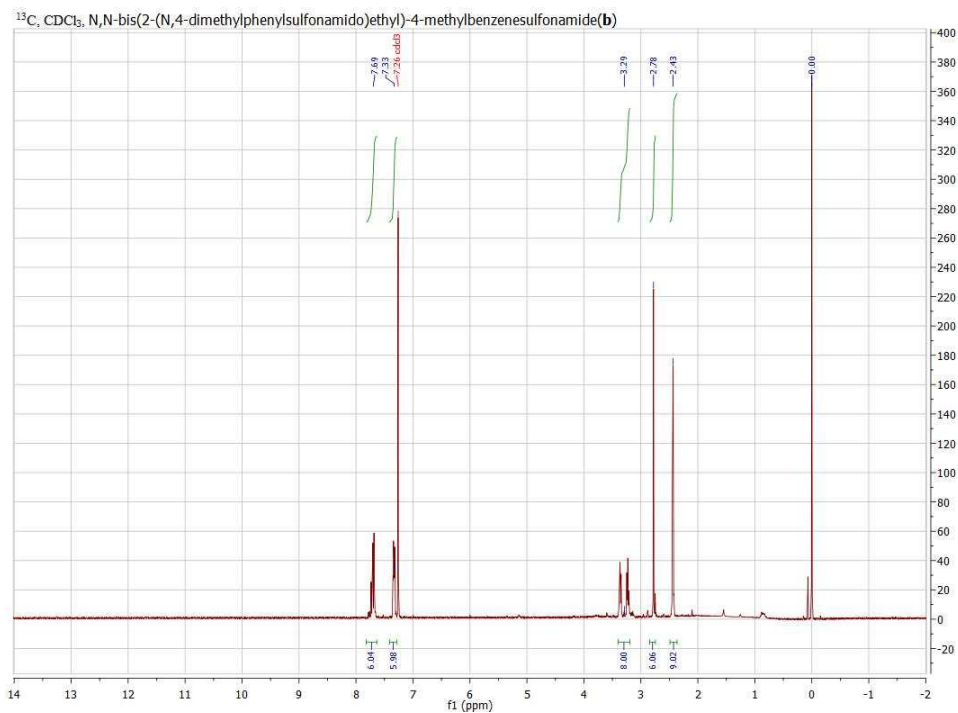

$^{13}\text{C}$  NMR (400 MHz,  $\text{CDCl}_3$ ):

*N,N*-Bis(2-(*N*,4-dimethylphenylsulfonamido)ethyl)-4-methylbenzenesulfonamide (**2**)

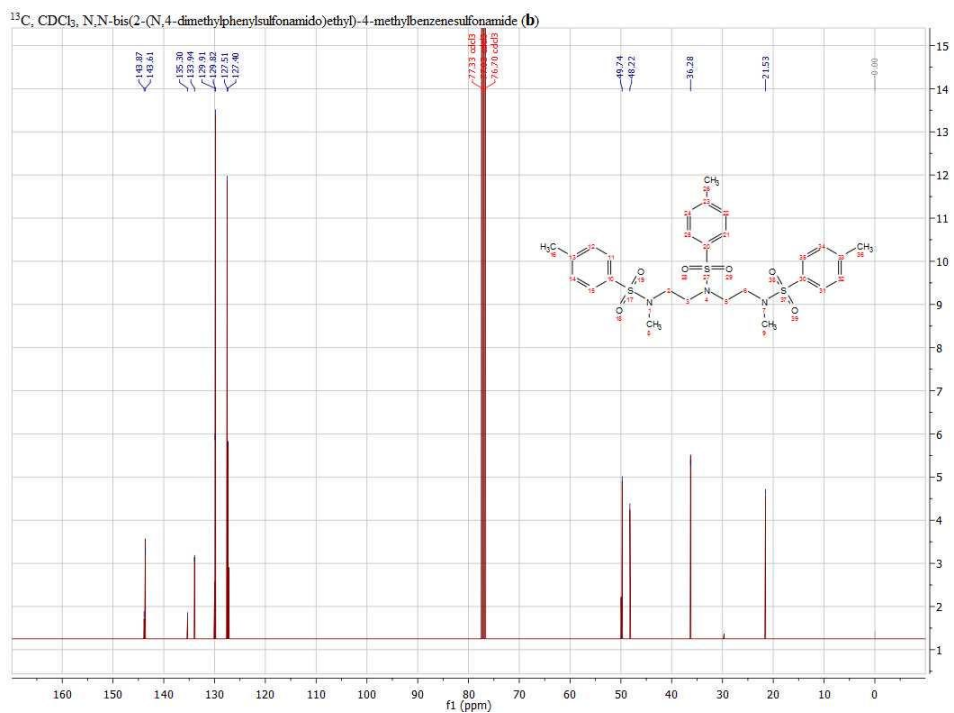

$^1\text{H}$  NMR (400 MHz,  $\text{D}_2\text{O}$ ):

*N,N'*-dimethyldiethylene triamine trihydrochloride (**3**)

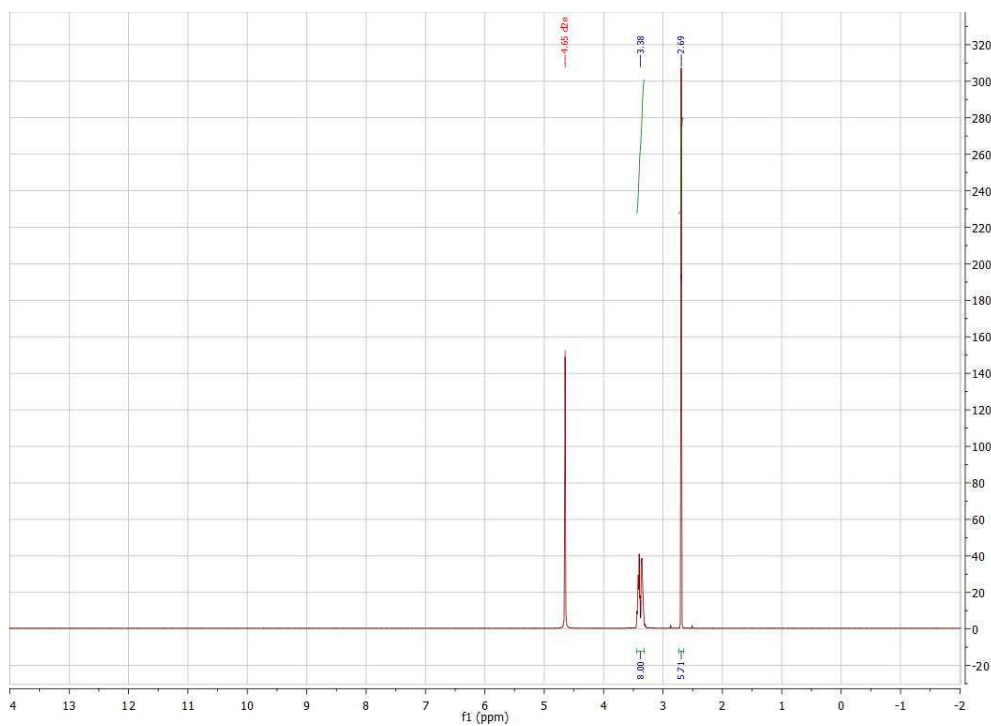

$^{13}\text{C}$  NMR (400 MHz,  $\text{D}_2\text{O}$ ):

*N,N'*-dimethyldiethylene triamine trihydrochloride (**3**)

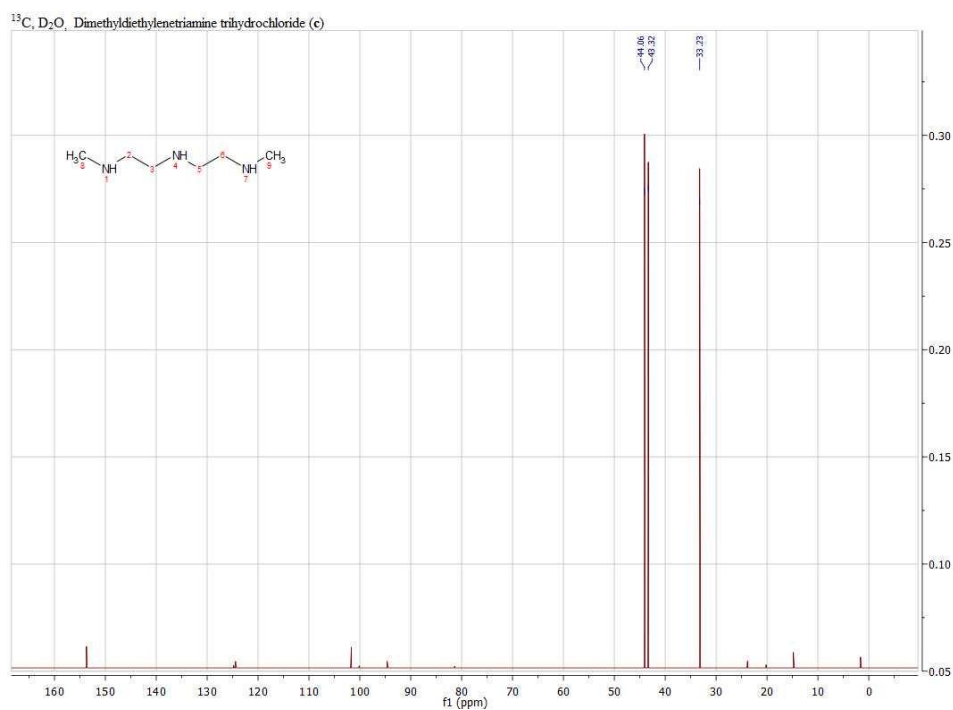

$^1\text{H}$  NMR (400 MHz,  $\text{CDCl}_3$ ):

*N,N'*-dimethyldiethylene triamine (**4**)

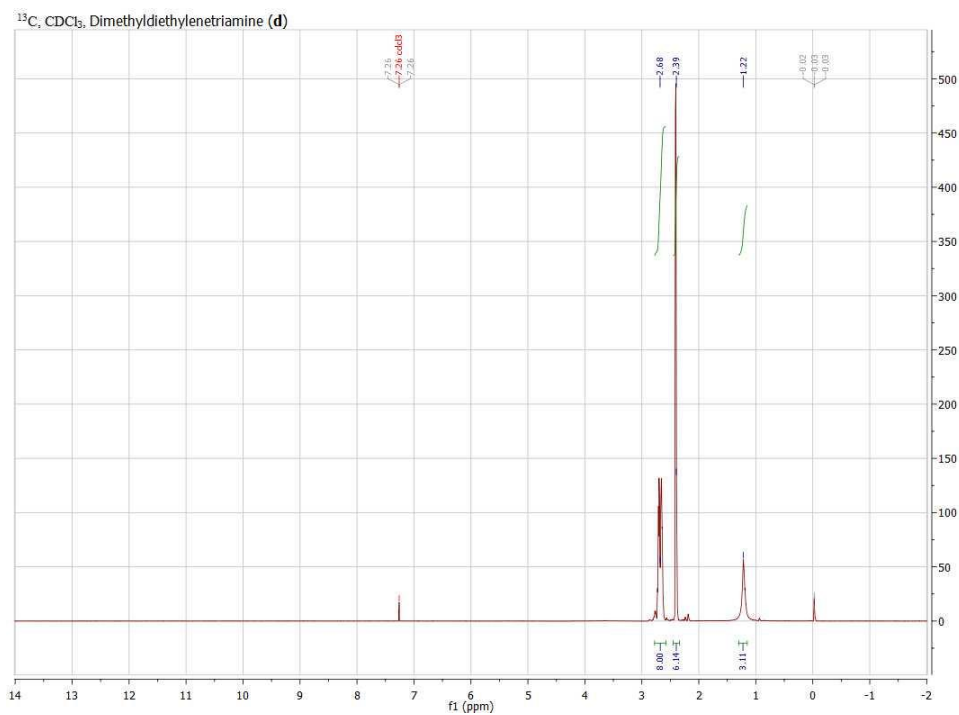

$^{13}\text{C}$  NMR (400 MHz,  $\text{CDCl}_3$ ):

*N,N'*-dimethyldiethylene triamine (**4**)

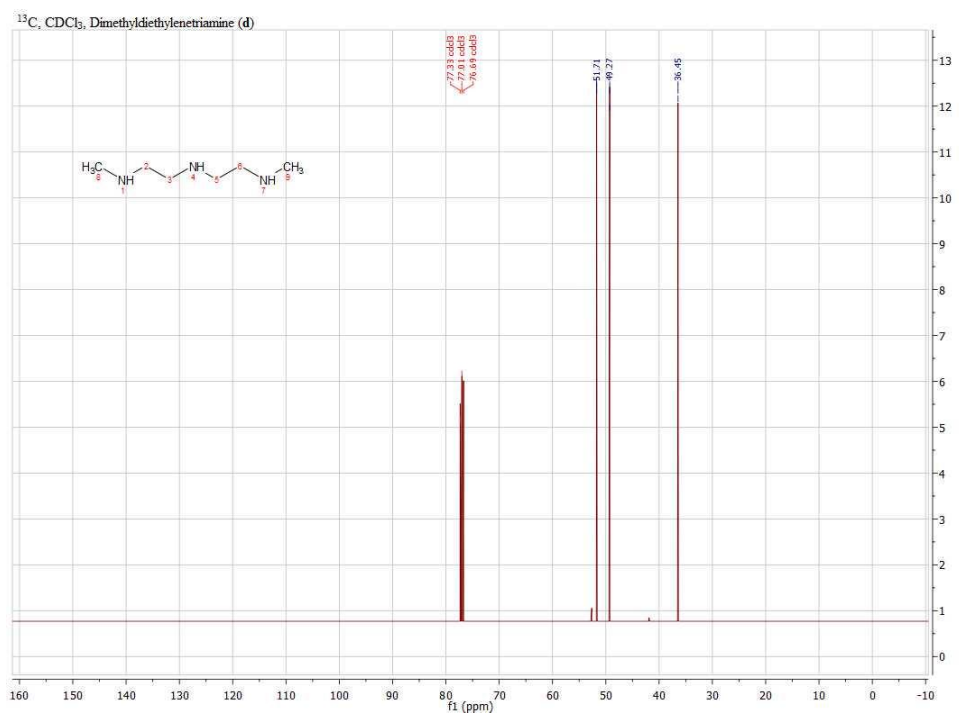

Supplement: Additional file 1 [file 1860-5397-8-221-S1.pdf]
